## Subject Index vol. 24

compiled by Wilhelm Baumann, Zürich

- Acute renal failure, haemodialysis by**  
Aorta-Cava catheter, 30  
**Adrenal medulla, electron microscopic study, 79**  
**Anurie oder mechanisches Abflusshindernis, 139**  
**Anuria renal u obstrucción mecánica, 139**  
**Aorta-cava Teflon catheter for haemodialysis, 30**
- Beckenvenendarstellung, 551**  
**Biopsie de la prostate par aspiration, 560**  
**Bleeding in prostatectomy, 418, 426**  
**Blutstillung bei Prostatektomie, 418, 426**
- Calculithiasis, 318**  
**Cavernography, 551**  
**Cistectomy, 193**  
**Competitive protein binding, 481**  
**Congélation de la prostate, 145, 153, 160, 177**  
**Congenital reflux, surgical management, 502**  
**Congenital reflux, the etiology, 119**  
**Cryotherapy of heterotransplanted human cancer, 166**  
**Cryosurgery, 439**  
**Cryosurgery of the prostate, 145, 153, 160, 177**
- Denis Browne's hypospadias correction, 135**  
**Derivación urinaria temporal en las intervenciones sobre uretra, 97**
- Einzelniere, chirurgische Behandlung, 527**  
**Electromanometry, 289**  
**Electromyography, 289**  
**Epididyme, Malakoplakie, 364**
- Female urethra, reconstruction, 73**  
**Feocromocitoma, estudio mediante microscopio electronico, 79**  
**Fibrinolytische Haemorrhagie, 385**
- Haemodialysis, aorta-cava Teflon catheter, 30**  
**Harnableitung bei Operationen, 97**  
**Harnblase, Aetiologie der Tumoren, 276**  
-, Rekonstruktion, 193  
-, Transplantation im Tierexperiment, 193  
**Harnröhre, Wiederherstellung bei der Frau, 73**  
**Hemorrhage by fibrinolysis, 385**  
**Hémostase dans la prostatectomie, 418, 426**  
**Hibernation, action du Mannitol, 45**  
**Hyperparathyroidisme primaire, 466**  
**Hypertension, renovascular, 1, 12**  
**Hypertonic, renovaskuläre, 1, 12**  
**Hypospadié-Korrektur nach Denis Browne, Fistelverschluss, 135**  
**Hippuran-I-131 renography, 37**
- Intranatal renal rupture, 58**
- Kältebehandlung heterotransplanterter Tumoren, 166**

- Kidney, hypertrophied, 300**  
 –, solitary, surgical treatment, 527  
 Kryotherapie heterotransplanterter menschlicher Tumoren, 166
- Lithiases calciques, 318**  
 Lysozymuria in renal calculus, 310
- Malakoplakia testis et epididymidis, 364**  
 Malakoplakia vesicae urinariae, 355  
 Mannitol treatment with hibernation, 45  
 Megaloureter congenitalis, 344  
 Méga-uretère primaire, l'étiologie, 119  
 –, traitement chirurgical, 502
- Nebennierenmark, elektronenmikroskopische Untersuchung, 79**  
 Néphrogrammes par Hippuran-I-131, 37  
 Nephrolithiasis, Calcilithiasis, 318  
 –, Lysozymuria, 310  
 Nieren, kompensatorisch hypertrophe, 300  
 Nierenarterienstenose und Hypertonie, 1, 12  
 Nierenruptur, geburtstraumatische, 58  
 Nierenversagen, infolge Vergiftung, 111  
 –, Hämodialyse durch Aorten-Cava Katheter, 30
- Obstruktive Uropathie oder Anurie, 139**  
 Oxalate calculus, 318
- Pelvic phlebography, 551**  
 Perineale Harnfistel, 97  
 Phlébographie pelvienne, 551  
 Pheochromocytoma, an electron microscopic study, 79  
 Phosphate metabolism, 66  
 Primary megaureter, surgical management, 502  
 Prostata, Aspirationsbiopsie, 560  
 Prostataoperationen, Kältechirurgie, 145, 153, 160, 177  
 Prostate, cryochirurgie, 145, 153, 160, 177  
 Prostatektomie, Blutstillung, 418, 426  
 Prostatic carcinoma, biopsy technic, 560  
 Prostatic freezing, 145, 153, 160, 177  
 Protein binding, competitive, 481
- Pyelo-Ureteroscopy, 289**  
 Pyelonephritis xanthogranulomatosa, 330  
 Pyrophosphatstoffwechsel, 66
- Rein, hypertrophie compensatrice, 300**  
 –, insuffisance aiguë, hémodialyse par sondes transfémorales, 30  
 –, intoxiqué, la récupération fonctionnelle, 111  
 –, rupture par traumatisme obstétrical, 58  
 –, sténose artérielle et hypertension, 1, 12  
 –, unique, traitement chirurgical, 527  
 Reflux congénital, l'étiologie, 119  
 –, traitement chirurgical, 502  
 –, sterile, 460  
 Renal artery stenosis and hypertension, 1, 24  
 –, calculus, Lysozymuria, 310  
 –, failure, poisonous, 111  
 –, rupture, intranatal, 58  
 Renography, Hippuran-I-131, 37  
 Renovascular hypertension, 1, 12  
 Riñón, actividad pirofosfatasa, 66  
 –, estenosis de la arteria, 1, 12  
 –, fallo agudo, hemodiálisis repetidas, 30  
 –, rehabilitación del fallo por intoxicación, 111  
 –, rupturas obstetricas, 58
- Solitary kidney, surgical treatment, 527**  
 Spermatogenesis in the rat, 372  
 Suprapubische Cystostomie, 97  
 Surrénale, étude électro-microscopique, 79
- Testicule, malakoplakia, 364**  
 Testosterone metabolism in man over 60 years, 481  
 Trigonal cystectomy, 193  
 Testosteronspiegel im Plasma, 481
- Untersuchungsmethoden, urodynamische, 289**  
 Urethral surgery, temporary urinary diversion, 97  
 Uretra femenina, reparación, 73  
 Urètre, dérivation temporaire de l'urine, 97

- Urinary bladder, aetiology of tumours, 276  
—, experimental transplantation, 193  
—, malakoplakia, 355  
—, reconstruction, 193  
Urodynamische Untersuchungsmethoden, 289  
Uromanometry, 289
- Vejiga urinaria, etiología de los tumores, 276  
—, malakoplakia, 355
- Vejiga, reconstrucción, 193  
—, trasplante en experimentación animal, 193  
Vereisung der Prostata, 145, 153, 160, 177  
Vessie urinaire, étiologie des tumeurs, 276  
—, malakoplakie, 355  
—, reconstruction, 193  
—, transplantation chez l'animal, 193
- Xanthogranulomatous pyelonephritis, 330
